# Supplementary material
Source: publisher figshare collection journal article supplement (https://tandf.figshare.com/ndownloader/files/17418623)
Supplement: Supplementary file 1 [file 17418623]

### Supplementary Materials

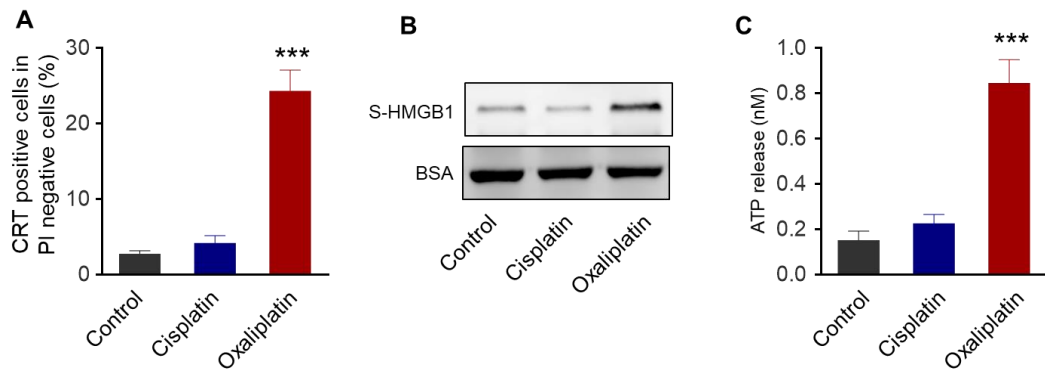

**Figure S1. Oxaliplatin induces an ICD response in KLN205 cells.** (A) The ratio of CRT positive cells in PI negative cells was quantified based on the results of flow cytometry detection after treated with 20  $\mu$ M Cisplatin or Oxaliplatin for 24 h. (B) Released HMGB1 (S-HMGB1) in the PBS, Cisplatin and Oxaliplatin treated KLN205 cells. (C) Amount of released ATP in the PBS, Cisplatin and Oxaliplatin treated KLN205 cells. Data represent means  $\pm$  SD. \*\*\* $p < 0.001$ , one-way ANOVA.
